# Supplementary material for: Structural characterization and AlphaFold modeling of human T cell receptor recognition of NRAS cancer neoantigens
Source: PubMed Central journal article supplement (PMC11584006; doi:10.1126/sciadv.adq6150), 2024-11-22
Supplement: sciadv.adq6150_sm.pdf [file sciadv.adq6150_sm.pdf]

Supplementary Materials for  
**Structural characterization and AlphaFold modeling of human T cell  
receptor recognition of NRAS cancer neoantigens**

Daichao Wu *et al.*

Corresponding author: Daichao Wu, wudaichao@usc.edu.cn; Roy A. Mariuzza, rmariuzz@umd.edu;  
Brian G. Pierce, pierce@umd.edu

*Sci. Adv.* **10**, eadq6150 (2024)  
DOI: 10.1126/sciadv.adq6150

**This PDF file includes:**

Figs. S1 to S6  
Tables S1 to S11

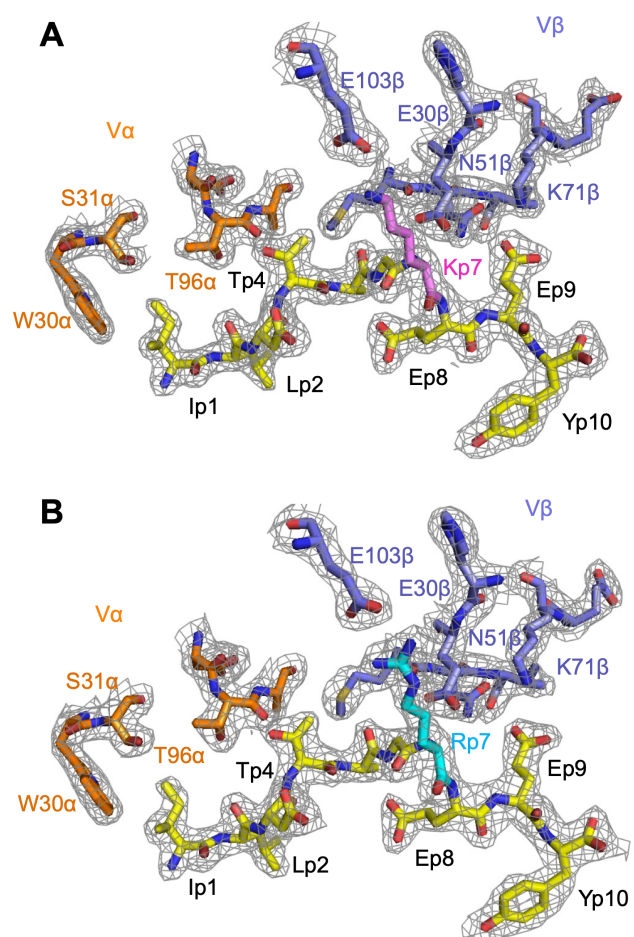

**Fig. S1. Electron density in the interfaces of the N17.1.2–NRAS<sup>Q61K</sup>–HLA-A1 and N17.1.2–NRAS<sup>Q61R</sup>–HLA-A1 complexes.** (A) Electron density in the interface of the N17.1.2–NRAS<sup>Q61K</sup>–HLA-A1 complex. Density from the final  $2F_o - F_c$  map at 2.10 Å resolution is contoured at  $1\sigma$ . (B) Electron density in the interface of the N17.1.2–NRAS<sup>Q61R</sup>–HLA-A1 complex. Density from the final  $2F_o - F_c$  map at 2.26 Å resolution is contoured at  $1\sigma$ . Carbon atoms are brown (N17.1.2  $\alpha$  chain), blue (N17.1.2  $\beta$  chain), yellow (NRAS peptide); violet (Q61K mutant residue), or cyan (Q61R mutant residue).

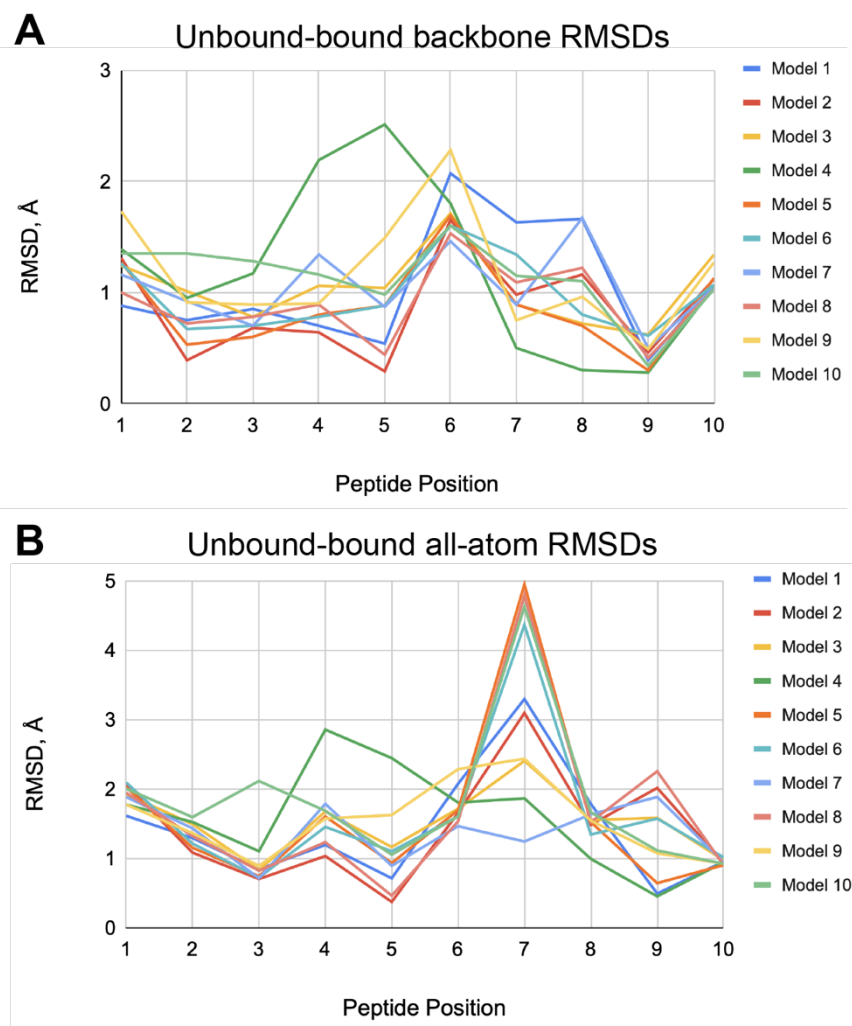

**Fig. S2. NRAS<sup>Q61K</sup> peptide per-residue root-mean-square distances (RMSDs) between N17.1.2 TCR-bound structure and unbound structure NMR models. (A) Backbone atom and (B) all-atom RMSD values were calculated for each peptide position after superposition of MHC in the N17.1.2-NRAS<sup>Q61K</sup>-HLA-A1 complex and MHC of unbound NRAS<sup>Q61K</sup>-HLA-A1 (PDB accession code 6MPP) (20). Per-residue RMSDs were calculated between TCR-bound peptide and each of 10 NMR models of the unbound NRAS<sup>Q61K</sup>-HLA-A1 structure (lines colored separately, as shown on right).**

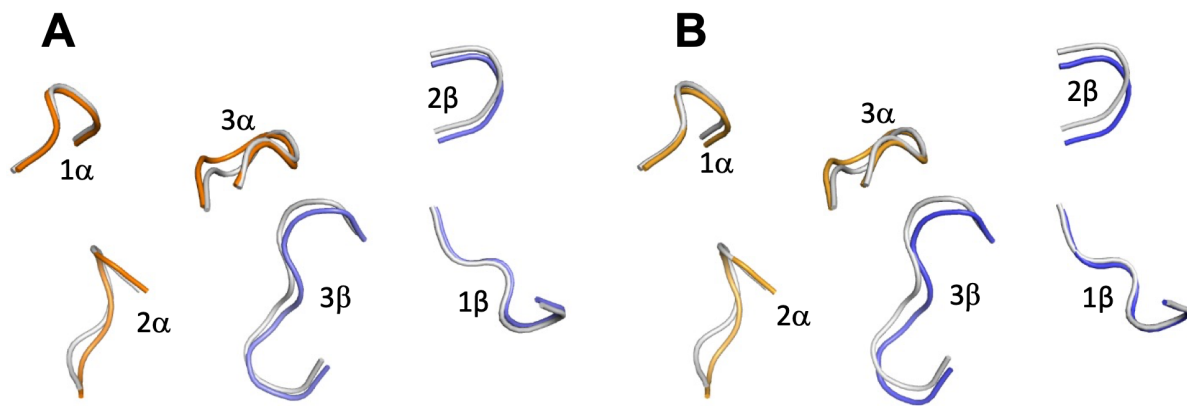

**Fig. S3. Comparison of CDR loops in unbound versus bound TCR N17.1.2.** (A) Superposition of CDR loops of unbound N17.1.2 (gray) onto CDR loops of N17.1.2 bound to NRAS<sup>Q61K</sup>-HLA-A1 (Vα CDRs, orange; Vβ CDRs, blue). (B) Superposition of CDR loops of unbound N17.1.2 (gray) onto CDR loops of N17.1.2 bound to NRAS<sup>Q61R</sup>-HLA-A1 (Vα CDRs, orange; Vβ CDRs, blue).

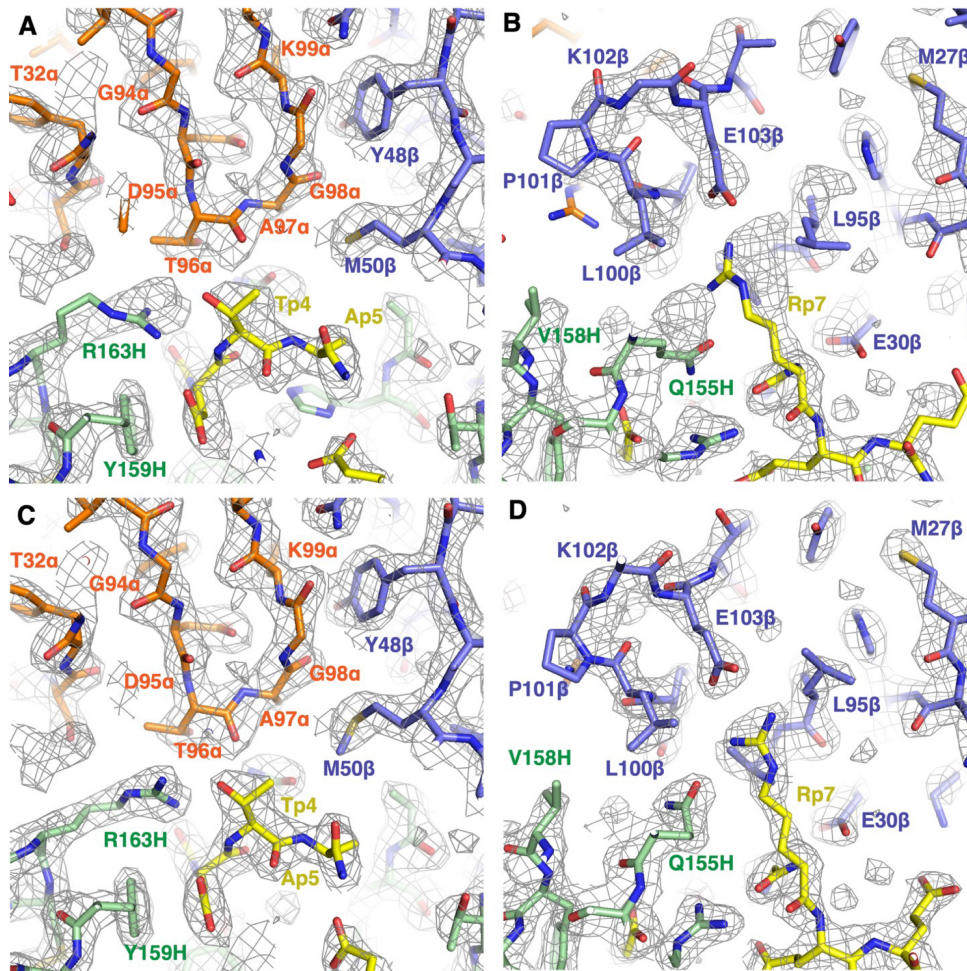

**Fig. S4. Comparison of AlphaFold prediction of TCR N17.1.2–NRAS<sup>Q61R</sup>–HLA-A1 complex generated by TCRmodel2 with crystallographic density map and structures. (A)** AlphaFold prediction of N17.1.2–NRAS<sup>Q61R</sup>–HLA-A1 complex compared with experimental electron density map in the region of CDR3α (Vα, orange; Vβ, blue; NRAS<sup>Q61R</sup> peptide, yellow; HLA-A1, green). **(B)** AlphaFold prediction of N17.1.2–NRAS<sup>Q61R</sup>–HLA-A1 complex compared with electron density map in the region of CDR3β. **(C)** Model of N17.1.2–NRAS<sup>Q61R</sup>–HLA-A1 complex built into electron density map in the region of CDR3α (Vα, orange; Vβ, blue; NRAS<sup>Q61R</sup> peptide, yellow; HLA-A1, green). **(D)** Model of N17.1.2–NRAS<sup>Q61R</sup>–HLA-A1 complex built into electron density map in the region of CDR3β.

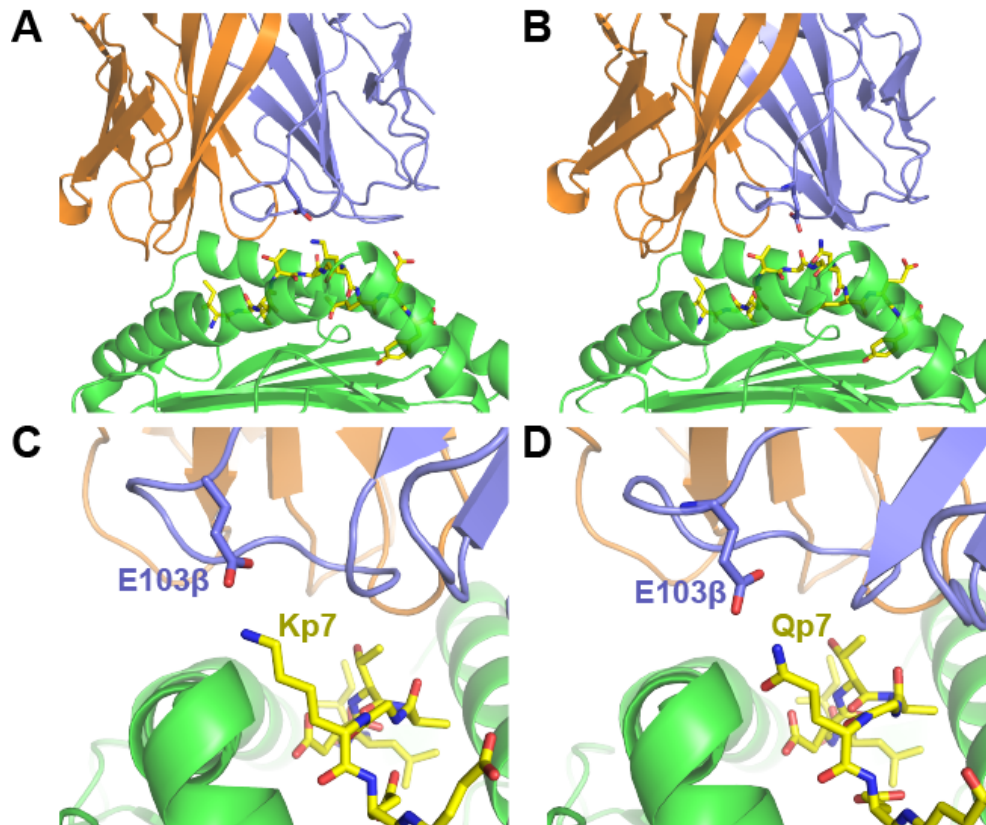

**Fig S5. Model of N17.1.2-NRAS<sup>Q61wt</sup>-HLA-A1 complex.** (A) The X-ray structure of the N17.1.2-NRAS<sup>Q61K</sup>-HLA-A1 X-ray structure is shown in comparison with (B) a model of the N17.1.2-NRAS<sup>Q61wt</sup>-HLA-A1 complex from TCRmodel2. A close-up view of the interface of the (C) Q61K complex and (D) wild-type complex interfaces is also shown, with TCRβ E103 and peptide K7/Q7 residues labeled. TCRs are orange ( $\alpha$  chain) and slate ( $\beta$  chain), peptides are yellow, and HLA-A1 MHCs are green. AlphaFold2 scores for the modeled complex are 0.91 (model confidence) and 91.4 (I-pLDDT), and the NRAS<sup>Q61wt</sup> complex model has 0.81 Å interface RMSD with the NRAS<sup>Q61K</sup> X-ray complex.

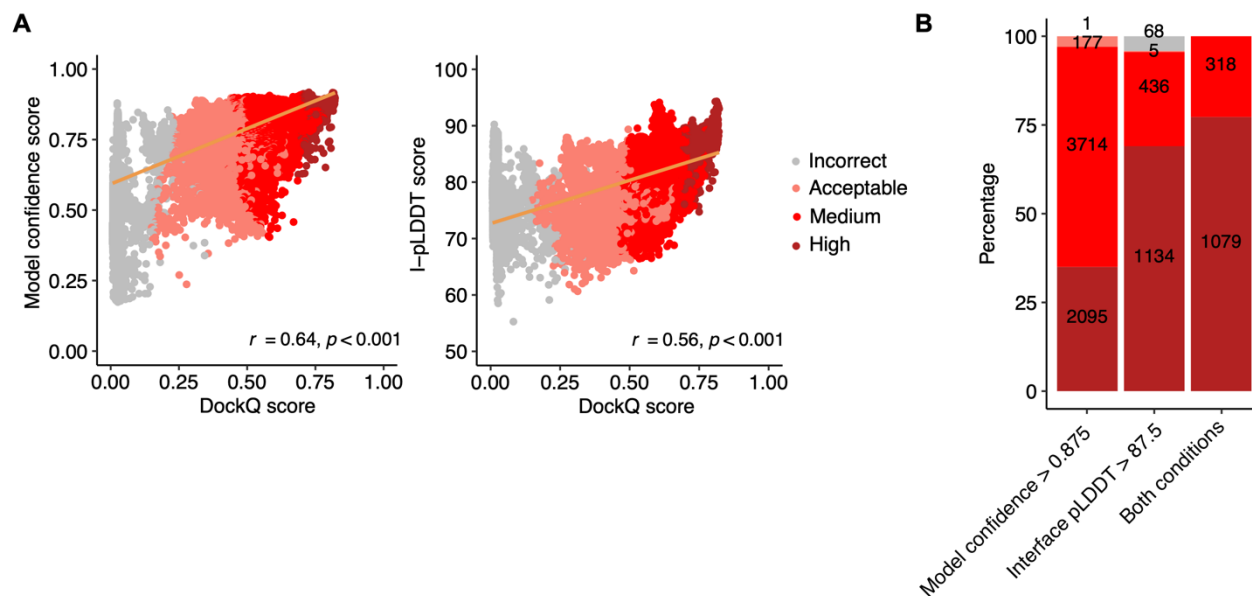

**Fig S6. Score versus accuracy for TCR-pMHC benchmark models.** (A) 1000 TCRmodel2 models were generated for each of 20 benchmark complexes (from (25)), and AlphaFold2 model confidence scores (left) and interface pLDDT (I-pLDDT) scores (right) are shown compared with model accuracy (DockQ score) for each model. Points are colored by CAPRI accuracy levels, as indicated on the right. Best fit regression lines (orange) and Pearson correlation values, and correlation p-values shown for reference. (B) Accuracy rates for pooled benchmark models with the specified AlphaFold score cutoffs for model confidence, interface pLDDT (I-pLDDT), or combination of both individual cutoffs. The stacked bars denote the proportion of Incorrect, Acceptable, Medium, and High CAPRI accuracy criteria predictions for the cutoff. Numerical labels indicate the model counts for each accuracy level.

|                                           | N17.1.2–Q61K–HLA-A1              | N17.1.2–Q61R–HLA-A1              | N17.1.2                                |
|-------------------------------------------|----------------------------------|----------------------------------|----------------------------------------|
| PDB                                       | 8YIV                             | 8YJ2                             | 8YJ3                                   |
| <b>Data collection</b>                    |                                  |                                  |                                        |
| Resolution range (Å)                      | 42.7–2.10 (2.18–2.10)            | 42.8–2.26 (2.34–2.26)            | 47.6–3.50 (3.63–3.50)                  |
| Space group                               | <i>C</i> 2 2 21                  | <i>C</i> 2 2 21                  | <i>P</i> 1 21 1                        |
| Unit cell parameters                      | 71.1, 133.2, 222.5<br>90, 90, 90 | 71.5, 134.2, 222.1<br>90, 90, 90 | 103.2, 66.1,<br>138.6,<br>90, 97.8, 90 |
| Total reflections <sup>a</sup>            | 387,710 (25,546)                 | 464,104 (24,741)                 | 148,044 (14,845)                       |
| Unique reflections <sup>a</sup>           | 61,763 (6,011)                   | 49,624 (4,524)                   | 23,156 (2,248)                         |
| Multiplicity <sup>a</sup>                 | 6.3 (4.2)                        | 9.3 (5.5)                        | 6.4 (6.6)                              |
| Completeness (%) <sup>a</sup>             | 99.8 (99.0)                      | 98.5 (91.0)                      | 97.7 (97.3)                            |
| Mean $I/\sigma(I)$ <sup>a</sup>           | 13.7 (2.2)                       | 13.5 (2.2)                       | 9.8 (1.7)                              |
| Wilson <i>B</i> factor (Å <sup>2</sup> )  | 33.9                             | 32.4                             | 112.0                                  |
| $R_{\text{merge}}$ <sup>a,b</sup>         | 0.080 (0.403)                    | 0.124 (0.490)                    | 0.206 (0.821)                          |
| CC1/2                                     | 0.992 (0.857)                    | 0.985 (0.883)                    | 0.953 (0.777)                          |
|                                           |                                  |                                  |                                        |
| <b>Refinement</b>                         |                                  |                                  |                                        |
| $R_{\text{work}}$ <sup>c</sup>            | 0.191 (0.228)                    | 0.189 (0.228)                    | 0.258 (0.334)                          |
| $R_{\text{free}}$ <sup>c</sup>            | 0.226 (0.305)                    | 0.229 (0.263)                    | 0.316 (0.366)                          |
| No. of protein atoms                      | 6,683                            | 6,680                            | 14,248                                 |
| No. of waters                             | 547                              | 426                              | 0                                      |
| Protein residues                          | 835                              | 832                              | 1796                                   |
| r.m.s.d. from ideality                    |                                  |                                  |                                        |
| Bond lengths (Å)                          | 0.011                            | 0.009                            | 0.004                                  |
| Bond angles (°)                           | 1.46                             | 1.31                             | 1.10                                   |
| Ramachandran plot statistics              |                                  |                                  |                                        |
| Favored (%)                               | 97.0                             | 97.0                             | 95.0                                   |
| Allowed (%)                               | 3.0                              | 3.0                              | 5.0                                    |
| Disallowed (%)                            | 0                                | 0                                | 0                                      |
| Clashscore                                | 8.8                              | 5.6                              | 6.8                                    |
| Average <i>B</i> factor (Å <sup>2</sup> ) | 39.4                             | 35.8                             | 125.0                                  |
| Protein                                   | 39.1                             | 35.7                             | 125.0                                  |
| Waters                                    | 41.7                             | 37.8                             | –                                      |

**Table S1. Data collection and refinement statistics**

<sup>a</sup>Values in parentheses correspond to the highest resolution shell.

<sup>b</sup> $R_{\text{merge}} = \sum |I_j - \langle I \rangle| / \sum I_j$ , where  $I_j$  is the intensity of an individual reflection and  $\langle I \rangle$  is the average intensity of that reflection.

<sup>c</sup> $R_{\text{work}} (R_{\text{free}}) = \sum ||F_o| - |F_c|| / \sum |F_o|$ ; 5.0% of data were used for  $R_{\text{free}}$ .



| Complex PDB <sup>1</sup>   | TCR position,<br>Å <sup>2</sup> | % Peptide<br>Contacts <sup>3</sup> |
|----------------------------|---------------------------------|------------------------------------|
| 4JRY                       | -14.6                           | 20                                 |
| 6TRO                       | -6.1                            | 35                                 |
| <b>N17.1.2-Q61R-HLA-A1</b> | <b>-3.6</b>                     | 26                                 |
| 6ULR                       | -3.5                            | 17                                 |
| <b>N17.1.2-Q61K-HLA-A1</b> | <b>-2.8</b>                     | 22                                 |
| 3FFC                       | -2.3                            | 29                                 |
| 6AVF                       | -1.7                            | 36                                 |
| 4QRP                       | -0.9                            | 36                                 |
| 2NX5                       | -0.7                            | 38                                 |
| 8GVB                       | -0.5                            | 19                                 |
| 1AO7                       | -0.4                            | 39                                 |
| 3HG1                       | -0.2                            | 42                                 |
| 5BRZ                       | 0.1                             | 14                                 |
| 6R2L                       | 0.4                             | 32                                 |
| 3UTS                       | 0.4                             | 59                                 |
| 1KJ2                       | 0.7                             | 19                                 |
| 2AK4                       | 1.2                             | 68                                 |
| 5WKH                       | 1.2                             | 32                                 |
| 3QDG                       | 1.3                             | 40                                 |
| 3VXR                       | 1.5                             | 42                                 |
| 3O4L                       | 1.7                             | 31                                 |
| 3VXU                       | 1.9                             | 24                                 |
| 6AVG                       | 2.0                             | 40                                 |
| 5NHT                       | 2.7                             | 46                                 |
| 3VXM                       | 2.7                             | 60                                 |
| 7PHR                       | 2.8                             | 24                                 |
| 7L1D                       | 2.9                             | 27                                 |
| 3MV7                       | 3.1                             | 62                                 |
| 5XOV                       | 3.6                             | 45                                 |
| 6RSY                       | 3.6                             | 36                                 |
| 6BJ3                       | 3.8                             | 30                                 |
| 4MNQ                       | 3.9                             | 45                                 |
| 6VMX                       | 4.0                             | 37                                 |
| 1LP9                       | 4.0                             | 34                                 |
| 7RRG                       | 4.1                             | 11                                 |
| 8DNT                       | 4.1                             | 40                                 |
| 6RP9                       | 4.2                             | 56                                 |
| 6VM8                       | 4.3                             | 48                                 |
| 5JHD                       | 4.5                             | 27                                 |
| 5ISZ                       | 4.6                             | 36                                 |
| 3QDM                       | 4.9                             | 51                                 |
| 7DZM                       | 5.2                             | 46                                 |
| 6P64                       | 5.2                             | 50                                 |
| 5JZI                       | 5.2                             | 34                                 |
| 5WLG                       | 5.3                             | 27                                 |
| 4MJI                       | 5.4                             | 27                                 |
| 7N6E                       | 5.4                             | 52                                 |
| 2YPL                       | 5.5                             | 52                                 |

|      |      |    |
|------|------|----|
| 5EU6 | 5.8  | 40 |
| 1OGA | 5.8  | 35 |
| 6MTM | 5.8  | 25 |
| 4EUP | 5.8  | 56 |
| 7NDQ | 5.9  | 23 |
| 2BNQ | 5.9  | 56 |
| 1G6R | 6.0  | 49 |
| 3SJV | 6.2  | 29 |
| 7N1F | 6.2  | 58 |
| 7PDW | 6.3  | 48 |
| 2ESV | 6.3  | 45 |
| 6RPB | 6.4  | 40 |
| 5TJE | 6.4  | 40 |
| 7N2N | 6.9  | 36 |
| 8D5Q | 7.0  | 56 |
| 5D2N | 7.1  | 34 |
| 3GSN | 7.6  | 47 |
| 6RPA | 7.7  | 40 |
| 7OW5 | 7.8  | 26 |
| 1FO0 | 9.6  | 42 |
| 7RK7 | 9.6  | 38 |
| 6ZKZ | 9.7  | 23 |
| 6VRM | 9.8  | 41 |
| 5W1W | 10.4 | 30 |
| 1MI5 | 10.6 | 17 |
| 6L9L | 10.6 | 62 |
| 7N4K | 10.7 | 62 |
| 4QRR | 10.9 | 33 |
| 5IVX | 10.9 | 44 |
| 7NA5 | 11.9 | 47 |
| 7N1E | 12.0 | 59 |
| 4G8G | 12.2 | 29 |
| 3TFK | 12.4 | 33 |
| 5TEZ | 13.0 | 38 |
| 6VRN | 14.8 | 68 |
| 5SWS | 22.3 | 25 |

**Table S2. MHC peptide groove axis position, and percentage of peptide contacts, of TCR in N17.1.2 complex structures and 82 reference TCR–peptide–MHC class I complex structures**

<sup>1</sup>Protein Data Bank (PDB) code of TCR–pMHC complex structure, or structure from this study (N17.1.2–Q61K–HLA-A1, N17.1.2–Q61R–HLA-A1; bold). Complexes from PDB are a set of 82 nonredundant TCR–pMHC class I structures from TCR3d (32).

<sup>2</sup>Position on MHC peptide groove axis, in Ångstroms, of TCR variable domain center projected onto MHC plane, as previously described (3), based on the reference frames in the TCR3d database (4). The axis is oriented with peptide C-terminus in the positive direction. Structures are listed in order of position.

<sup>3</sup>Percent of peptide contacts among total TCR atomic contacts (< 4 Å) to peptide and MHC.

| HLA-A1     | N17.1.2-Q61K                                                                                                                                               |                                                                               | N17.1.2-Q61R                                                                                                                                                                     |                                                                                                    |
|------------|------------------------------------------------------------------------------------------------------------------------------------------------------------|-------------------------------------------------------------------------------|----------------------------------------------------------------------------------------------------------------------------------------------------------------------------------|----------------------------------------------------------------------------------------------------|
|            | Hydrogen bonds                                                                                                                                             | Van der Waals contacts                                                        | Hydrogen bonds                                                                                                                                                                   | Van der Waals contacts                                                                             |
| $\alpha 1$ |                                                                                                                                                            |                                                                               |                                                                                                                                                                                  |                                                                                                    |
| E55H       | W30 $\alpha$ (N $\epsilon$ 1) E55H(O $\epsilon$ 2)                                                                                                         | W30 $\alpha$ (3)                                                              | W30 $\alpha$ (N $\epsilon$ 1) E55H(O $\epsilon$ 2)                                                                                                                               | W30 $\alpha$ (3)                                                                                   |
| E58H       | S28 $\alpha$ (O $\gamma$ ) E58H(O $\epsilon$ 2),<br>S28 $\alpha$ (O $\gamma$ ) E58H(O $\epsilon$ 1),<br>W29 $\alpha$ (N $\epsilon$ 1) E58H(O $\epsilon$ 1) | S28 $\alpha$ (2),<br>W29 $\alpha$ (3)                                         | S28 $\alpha$ (O $\gamma$ ) E58H(O $\epsilon$ 2),<br>S28 $\alpha$ (O $\gamma$ ) E58H(O $\epsilon$ 1)                                                                              | S28 $\alpha$ (2),<br>W29 $\alpha$ (1)                                                              |
| Y59H       |                                                                                                                                                            | W30 $\alpha$ (3)                                                              |                                                                                                                                                                                  | W30 $\alpha$ (3)                                                                                   |
| Q62H       | T96 $\alpha$ (N) Q62H(O $\epsilon$ 1),<br>T96 $\alpha$ (O $\gamma$ 1) Q62H(O $\epsilon$ 1),<br>T96 $\alpha$ (O $\gamma$ 1) Q62H(N $\epsilon$ 2)            | D95 $\alpha$ (2),<br>T96 $\alpha$ (6)                                         | T96 $\alpha$ (N) Q62H(O $\epsilon$ 1),<br>T96 $\alpha$ (O $\gamma$ 1) Q62H(O $\epsilon$ 1),<br>T96 $\alpha$ (O $\gamma$ 1) Q62H(N $\epsilon$ 2)                                  | D95 $\alpha$ (3),<br>T96 $\alpha$ (6),<br>A97 $\alpha$ (1)                                         |
| R65H       | Y48 $\beta$ (O $\eta$ ) R65H(N $\eta$ 1),<br>D95 $\alpha$ (O $\delta$ 2) R65H(N $\eta$ 1),<br>D95 $\alpha$ (O $\delta$ 2) R65H(N $\eta$ 2),                | Y48 $\beta$ (3),<br>D56 $\beta$ (6),<br>D95 $\alpha$ (3),<br>A97 $\alpha$ (3) | Y48 $\beta$ (O $\eta$ ) R65H(N $\eta$ 1),<br>D95 $\alpha$ (O $\delta$ 2) R65H(N $\eta$ 1),<br>D95 $\alpha$ (O $\delta$ 2) R65H(N $\eta$ 2),<br>A97 $\alpha$ (O) R65H(N $\eta$ 1) | Y48 $\beta$ (3),<br>D56 $\beta$ (6),<br>D95 $\alpha$ (3),<br>A97 $\alpha$ (2),<br>K99 $\alpha$ (1) |
| N66H       | T96 $\alpha$ (O) N66H(N $\delta$ 2)                                                                                                                        | M50 $\beta$ (1),<br>T96 $\alpha$ (3),<br>A97 $\alpha$ (3)                     | T96 $\alpha$ (O) N66H(N $\delta$ 2)                                                                                                                                              | M50 $\beta$ (1),<br>T96 $\alpha$ (4),<br>A97 $\alpha$ (3)                                          |
| K68H       | T55 $\beta$ (O) K68H(N $\zeta$ ),<br>D56 $\beta$ (O $\delta$ 1) K68H(N $\zeta$ ),<br>D56 $\beta$ (O $\delta$ 2) K68H(N $\zeta$ )                           | D56 $\beta$ (2),                                                              | T55 $\beta$ (O) K68H(N $\zeta$ ),<br>D56 $\beta$ (O $\delta$ 1) K68H(N $\zeta$ ),<br>D56 $\beta$ (O $\delta$ 2) K68H(N $\zeta$ )                                                 | D56 $\beta$ (2),                                                                                   |
| A69H       |                                                                                                                                                            | M50 $\beta$ (1)                                                               |                                                                                                                                                                                  | M50 $\beta$ (1)                                                                                    |
| Q72H       |                                                                                                                                                            | V52 $\beta$ (1),<br>E53 $\beta$ (1),<br>V54 $\beta$ (2)                       |                                                                                                                                                                                  | V52 $\beta$ (1),<br>E53 $\beta$ (3),<br>V54 $\beta$ (2)                                            |
| T73H       |                                                                                                                                                            |                                                                               |                                                                                                                                                                                  | N51 $\beta$ (1)                                                                                    |
| $\alpha 2$ |                                                                                                                                                            |                                                                               |                                                                                                                                                                                  |                                                                                                    |
| E154H      | K102 $\beta$ (N $\zeta$ ) E154H(O $\epsilon$ 1),<br>K102 $\beta$ (N $\zeta$ ) E154H(O $\epsilon$ 2)                                                        | L100 $\beta$ (3),<br>K102 $\beta$ (2)                                         | K102 $\beta$ (N $\zeta$ ) E154H(O $\epsilon$ 2)                                                                                                                                  | L100 $\beta$ (2),<br>K102 $\beta$ (3)                                                              |
| Q155H      | T98 $\beta$ (O) Q155H(N $\epsilon$ 2),                                                                                                                     | V96 $\beta$ (3),<br>T98 $\beta$ (1),<br>L100 $\beta$ (5),                     | T98 $\beta$ (O) Q155H(N $\epsilon$ 2),                                                                                                                                           | V96 $\beta$ (2),<br>T98 $\beta$ (1),<br>L100 $\beta$ (2)                                           |
| V158H      |                                                                                                                                                            |                                                                               |                                                                                                                                                                                  | L100 $\beta$ (1)                                                                                   |
| G162H      |                                                                                                                                                            | D54 $\alpha$ (2)                                                              |                                                                                                                                                                                  |                                                                                                    |
| R163H      | Y33 $\alpha$ (O $\eta$ ) R163H(N $\eta$ 2)                                                                                                                 | S31 $\alpha$ (2),<br>D54 $\alpha$ (2),<br>T96 $\alpha$ (7)                    |                                                                                                                                                                                  | S31 $\alpha$ (1),<br>D54 $\alpha$ (1),<br>T96 $\alpha$ (8),<br>T98 $\beta$ (1)                     |
| D166H      | D54 $\alpha$ (O $\delta$ 1) D166H(O $\delta$ 1),<br>D54 $\alpha$ (O $\delta$ 1) D166H(O $\delta$ 2)                                                        | W30 $\alpha$ (1),<br>D54 $\alpha$ (5)                                         | D54 $\alpha$ (O $\delta$ 1) D166H(O $\delta$ 2)                                                                                                                                  | W30 $\alpha$ (2),<br>D54 $\alpha$ (9)                                                              |
| G167H      |                                                                                                                                                            | W30 $\alpha$ (2)                                                              |                                                                                                                                                                                  | W30 $\alpha$ (2)                                                                                   |
| R170H      | W30 $\alpha$ (N $\epsilon$ 1) R170H(N $\epsilon$ )                                                                                                         | W30 $\alpha$ (22)                                                             | W30 $\alpha$ (N $\epsilon$ 1) R170H(N $\epsilon$ )                                                                                                                               | W30 $\alpha$ (23)                                                                                  |
| Y171H      |                                                                                                                                                            | W30 $\alpha$ (2)                                                              |                                                                                                                                                                                  | W30 $\alpha$ (2)                                                                                   |

**Table S3. Interactions between N17.1.2 and HLA-A1**

Contact residues were identified with the CONTACT program (48). Hydrogen bonds were calculated using a cut-off distance of 3.5 Å. The cut-off distance for van der Waals contacts was 4 Å.

| Mutant <sup>1</sup> | N17.1.2–<br>NRAS <sup>Q61K</sup> –<br>HLA-A1 | N17.1.2–<br>NRAS <sup>Q61R</sup> –<br>HLA-A1 |
|---------------------|----------------------------------------------|----------------------------------------------|
|                     | $\Delta\Delta G^2$                           | $\Delta\Delta G^2$                           |
| E55A                | 1.1                                          | 1.2                                          |
| E58A                | 1.0                                          | 1.2                                          |
| Y59A                | 0.5                                          | 0.5                                          |
| Q62A                | 1.1                                          | 1.1                                          |
| E63A                | 0.2                                          | 0.1                                          |
| R65A                | 2.4                                          | 2.4                                          |
| N66A                | 0.6                                          | 0.1                                          |
| K68A                | 0.9                                          | 1                                            |
| A69G                | 0.6                                          | 0.6                                          |
| Q72A                | 0.7                                          | 1.1                                          |
| T73A                | 0                                            | 0                                            |
| V150A               | 0.1                                          | 0                                            |
| H151A               | 0                                            | 0                                            |
| E154A               | 0.1                                          | 0.1                                          |
| Q155A               | 1.6                                          | 0.8                                          |
| V158A               | 0.1                                          | 0.3                                          |
| G162A               | -0.1                                         | 0.1                                          |
| R163A               | 2.1                                          | 2.0                                          |
| D166A               | 0.3                                          | 0                                            |
| G167A               | -0.2                                         | -0.2                                         |
| R170A               | 1.1                                          | 1.5                                          |
| Y171A               | 0.5                                          | 0.4                                          |

**Table S4. TCR binding affinity changes from computational alanine scanning of HLA-A1 MHC residues**

<sup>1</sup>MHC residue alanine substitutions for all MHC residues proximal to the TCR (< 5 Å) in the N17.1.2–NRAS<sup>Q61K</sup>–HLA-A1 complex structure. Wild-type alanine residues were mutated to glycine.

<sup>2</sup>Alanine (or glycine, for wild-type alanine residues) substitutions were modeled using a protocol in Rosetta (33, 53) to compute the TCR binding energy change ( $\Delta\Delta G$ ). Values are in Rosetta Energy Units (REU), comparable to kcal/mol. Predicted hotspots ( $\Delta\Delta G \geq 0.8$  REU) are highlighted in red.

| Q61K/R | N17.1.2-Q61K                                                                                                                                                                    |                                                                                                   | N17.1.2-Q61R                                                                                                                                                                              |                                                                                                   |
|--------|---------------------------------------------------------------------------------------------------------------------------------------------------------------------------------|---------------------------------------------------------------------------------------------------|-------------------------------------------------------------------------------------------------------------------------------------------------------------------------------------------|---------------------------------------------------------------------------------------------------|
|        | Hydrogen bonds                                                                                                                                                                  | Van der Waals contacts                                                                            | Hydrogen bonds                                                                                                                                                                            | Van der Waals contacts                                                                            |
| I1p    |                                                                                                                                                                                 | W30 $\alpha$ (3),<br>S31 $\alpha$ (1)                                                             |                                                                                                                                                                                           | W30 $\alpha$ (3),<br>S31 $\alpha$ (2)                                                             |
| T4p    | T96 $\alpha$ (O) T4p(O $\gamma$ 1)                                                                                                                                              | T96 $\alpha$ (4)<br>T98 $\beta$ (4)                                                               | T96 $\alpha$ (O) T4p(O $\gamma$ 1)                                                                                                                                                        | T96 $\alpha$ (4)<br>T98 $\beta$ (5)                                                               |
| G6p    |                                                                                                                                                                                 | E30 $\beta$ (3),<br>V96 $\beta$ (1)                                                               |                                                                                                                                                                                           | E30 $\beta$ (4)                                                                                   |
| K/R7p  | E30 $\beta$ (O $\epsilon$ 1) K7p(N),<br>E30 $\beta$ (O $\epsilon$ 2) K7p(N),<br>E103 $\beta$ (O $\epsilon$ 1) K7p(N $\zeta$ ),<br>E103 $\beta$ (O $\epsilon$ 2) K7p(N $\zeta$ ) | E30 $\beta$ (2),<br>L95 $\beta$ (1),<br>V96 $\beta$ (2),<br>L100 $\beta$ (2),<br>E103 $\beta$ (2) | E30 $\beta$ (O $\epsilon$ 2) R7p(N),<br>E103 $\beta$ (O $\epsilon$ 1) R7p(N $\eta$ 1),<br>E103 $\beta$ (O $\epsilon$ 2) R7p(N $\eta$ 1),<br>E103 $\beta$ (O $\epsilon$ 1) R7p(N $\eta$ 2) | E30 $\beta$ (3),<br>L95 $\beta$ (2),<br>V96 $\beta$ (5),<br>L100 $\beta$ (2),<br>E103 $\beta$ (5) |
| E9p    | N51 $\beta$ (O $\delta$ 1) E9p(O $\epsilon$ 2),<br>N51 $\beta$ (N $\delta$ 2) E9p(O $\epsilon$ 2),<br>K71 $\beta$ (N $\zeta$ ) E9p(O $\epsilon$ 2)                              | N51 $\beta$ (1),<br>K71 $\beta$ (3)                                                               | N51 $\beta$ (N $\delta$ 2) E9p(O $\epsilon$ 1),<br>K71 $\beta$ (N $\zeta$ ) E9p(O $\epsilon$ 1)                                                                                           | N51 $\beta$ (2),<br>K71 $\beta$ (2)                                                               |

**Table S5. Interactions between TCR N17.1.2 and NRAS<sup>Q61K/R</sup> peptide**

Contact residues were identified with CONTACT (48). Hydrogen bonds were calculated using a cut-off distance of 3.5 Å. The cut-off distance for van der Waals contacts was 4 Å.

| Mutant    | N17.1.2–<br>NRAS <sup>Q61K</sup> – | N17.1.2–<br>NRAS <sup>Q61R</sup> – |
|-----------|------------------------------------|------------------------------------|
|           | HLA-A1 <sup>1</sup>                | HLA-A1 <sup>1</sup>                |
| I55A      | 0.8                                | 0.7                                |
| L56A      | 0                                  | 0                                  |
| D57A      | 0.2                                | 0.3                                |
| T58A      | 2.1                                | 2.0                                |
| A59G      | 0.1                                | 0.1                                |
| G60A      | -0.2                               | -0.3                               |
| K61A/R61A | 1.4                                | 1.8                                |
| E62A      | 0.2                                | 0.3                                |
| E63A      | 0.9                                | 0.9                                |
| Y64A      | 0                                  | 0                                  |
| K61Q/R61Q | 1.2                                | 1.7                                |

**Table S6. TCR binding affinity changes from computational alanine and reversion (K61Q/R61Q) mutagenesis of peptide**

<sup>1</sup>Alanine (or glycine, for wild-type alanine residues) substitutions, or wild-type glutamine reversion substitutions (K61Q, R61Q), were modeled using a protocol in Rosetta (33, 53) to compute the TCR binding energy change ( $\Delta\Delta G$ ). Values are in Rosetta Energy Units (REU), comparable to kcal/mol. Predicted hotspots ( $\Delta\Delta G \geq 0.8$  REU) are highlighted in red.

**N17.1.2–NRAS<sup>Q61K</sup>–HLA-A1**

| Peptide residue | X-ray                                                                                          | TCRmodel2                                                          |
|-----------------|------------------------------------------------------------------------------------------------|--------------------------------------------------------------------|
| T4p             | <b>T96α(O) T4p(Oγ1)</b>                                                                        | <b>T96α(O) T4p(Oγ1)</b>                                            |
| K7p             | E30β(Oε1) K7p(N)<br><b>E30β(Oε2) K7p(N)</b><br><b>E103β(Oε1) K7p(Nζ)</b><br>E103β(Oε2) K7p(Nζ) | <b>E30β(Oε2) K7p(N)</b><br><b>E103β(Oε1) K7p(Nζ)</b>               |
| E9p             | N51β(Oδ1) E9p(Oε2)<br>N51β(Nδ2) E9p(Oε2)<br><b>K71β(Nζ) E9p(Oε2)</b>                           | <b>K71β(Nζ) E9p(Oε2)</b><br>K71β(Nζ) E9p(Oε1)<br>N28β(Nζ) E9p(Oε1) |

**N17.1.2–NRAS<sup>Q61R</sup>–HLA-A1**

| Peptide residue | X-ray                                                                                               | TCRmodel2                                                                                        |
|-----------------|-----------------------------------------------------------------------------------------------------|--------------------------------------------------------------------------------------------------|
| T4p             | <b>T96α(O) T4p(Oγ1)</b>                                                                             | <b>T96α(O) p4T(Oγ1)</b>                                                                          |
| R7p             | <b>E30β(Oε2) R7p(N)</b><br>E103β(Oε1) R7p(Nη1)<br>E103β(Oε2) R7p(Nη1)<br><b>E103β(Oε1) R7p(Nη2)</b> | <b>E30β(Oε2) R7p(N)</b><br>E30β(Oε1) R7p(N)<br><b>E103β(Oε1) R7p(Nη2)</b><br>E103β(Oε2) R7p(Nη2) |
| E9p             | N51β(Nδ2) E9p(Oε1)<br><b>K71β(Nζ) E9p(Oε1)</b>                                                      | <b>K71β(Nζ) E9p(Oε1)</b><br>K71β(Nζ) E9p(Oε2)                                                    |

**Table S7. TCR–peptide polar and charged atomic contacts in X-ray and AlphaFold (TCRmodel2) modeled interfaces**

Contacts were identified using the CONTACT program (48). Matching contacts between modeled and X-ray structures are shown on same line and in bold.

| TCR name | $\alpha$ chain |                  |            | $\beta$ chain |                   |           |
|----------|----------------|------------------|------------|---------------|-------------------|-----------|
|          | V $\alpha$     | CDR3 $\alpha$    | J $\alpha$ | V $\beta$     | CDR3 $\beta$      | J $\beta$ |
| N17.1.2  | TRDV1          | CALGDTAGKSTF     | TRAJ27-1   | TRBV27        | CASSLVSTPLPKETQYF | TRBJ2-5   |
| N17.2    | TRAV5          | CAESSGGGFKTIF    | TRAJ9      | TRBV6-6       | CASSTPGPSAYEQYF   | TRBJ2-7   |
| N17.3.2  | TRAV19         | CALSESGDAAGNKLTF | TRAJ17     | TRBV6-1       | CAEGENTEAF        | TRBJ1-1   |
| N17.5    | TRAV19         | CALSETINNAGNMLTF | TRAJ39     | TRBV6-6       | CASSQNTEAF        | TRBJ1-1   |
| N135.1   | TRAV19         | CALSESHNNAGNMLTF | TRAJ39     | TRBV6-1       | CAASQNTEAF        | TRBJ1-1   |

**Table S8. Sequence information for TCRs that target NRAS<sup>Q61K</sup>-HLA-A1, from Peri et al. (15)**



| Case | Model Accuracy <sup>1</sup> |            |        |      | Models Above Cutoff <sup>2</sup> |      |
|------|-----------------------------|------------|--------|------|----------------------------------|------|
|      | Incorrect                   | Acceptable | Medium | High | All                              | High |
| 7rrg | 156                         | 178        | 666    | 0    | 0                                | 0    |
| 7sg0 | 0                           | 2          | 998    | 0    | 39                               | 0    |
| 7ndq | 2                           | 190        | 808    | 0    | 2                                | 0    |
| 6zkw | 6                           | 434        | 444    | 116  | 5                                | 4    |
| 7na5 | 696                         | 262        | 34     | 8    | 0                                | 0    |
| 7dzm | 409                         | 256        | 305    | 30   | 8                                | 8    |
| 7qpj | 8                           | 356        | 395    | 241  | 176                              | 121  |
| 7ow5 | 347                         | 11         | 483    | 159  | 0                                | 0    |
| 8gom | 243                         | 258        | 499    | 0    | 0                                | 0    |
| 7sg1 | 1                           | 413        | 586    | 0    | 117                              | 0    |
| 7rk7 | 0                           | 1000       | 0      | 0    | 0                                | 0    |
| 7phr | 84                          | 0          | 0      | 916  | 511                              | 511  |
| 7n2n | 498                         | 483        | 19     | 0    | 0                                | 0    |
| 7t2b | 1                           | 189        | 810    | 0    | 0                                | 0    |
| 8gvb | 1                           | 17         | 982    | 0    | 0                                | 0    |
| 7rdv | 0                           | 0          | 582    | 418  | 189                              | 144  |
| 7t2c | 3                           | 0          | 997    | 0    | 0                                | 0    |
| 7z50 | 0                           | 0          | 279    | 721  | 350                              | 291  |
| 7l1d | 77                          | 438        | 485    | 0    | 0                                | 0    |
| 8d5q | 1                           | 682        | 317    | 0    | 0                                | 0    |

**Table S9. Accuracy levels of TCRmodel2 benchmark case models for total and filtered sets.**

<sup>1</sup>CAPRI accuracy levels are shown for the 1000 TCRmodel2 models for each TCR-pMHC benchmark complex.

<sup>2</sup>Number of total models and number of high accuracy models for each case above the proposed score cutoff (model confidence > 0.875 and I-pLDDT > 87.5).

| Score              | N17.1.2-Q61K-HLA-A1    |                           | N17.1.2-Q61R-HLA-A1    |                           |
|--------------------|------------------------|---------------------------|------------------------|---------------------------|
|                    | Top Model <sup>1</sup> | # High Top 5 <sup>2</sup> | Top Model <sup>1</sup> | # High Top 5 <sup>2</sup> |
| Model confidence   | High                   | 4                         | High                   | 5                         |
| I-pLDDT            | High                   | 4                         | High                   | 5                         |
| Rosetta REF15 (40) | Medium                 | 3                         | Medium                 | 0                         |
| ZRANK2 (41)        | Acceptable             | 1                         | Acceptable             | 0                         |

**Table S10. Ranking accuracy for N17.1.2 TCR-pMHC complex models.**

<sup>1</sup>TCRmodel2 models (1000 per complex) were ranked by the given score, and CAPRI accuracy of the top-ranked model is shown.

<sup>2</sup>Number of high accuracy models in the top 5 ranked models. The total numbers of high accuracy models are 10 (N17.1.2-Q61K-HLA-A1) and 7 (N17.1.2-Q61R-HLA-A1) for each set of 1000 models.

|                      | TCRmodel2               |                      | AlphaFold2.3            |                      | AlphaFold3              |                      |
|----------------------|-------------------------|----------------------|-------------------------|----------------------|-------------------------|----------------------|
| # Preds <sup>1</sup> | 1000                    |                      | 200                     |                      | 5                       |                      |
| Complex <sup>2</sup> | Model conf <sup>3</sup> | I-pLDDT <sup>3</sup> | Model conf <sup>3</sup> | I-pLDDT <sup>3</sup> | Model conf <sup>3</sup> | I-pLDDT <sup>3</sup> |
| N17.1.2              | 0.917                   | 93.5                 | 0.887                   | 81.87                | 0.94                    | 89.05                |
| N17.2                | 0.866                   | 85.29                | 0.832                   | 76.03                | 0.74                    | 67.62                |
| N17.3.2              | 0.885                   | 82.88                | 0.856                   | 79.59                | 0.83                    | 71.49                |
| N17.5                | 0.833                   | 74.77                | 0.863                   | 82.56                | 0.88                    | 77.52                |
| N135.1               | 0.863                   | 83.11                | 0.815                   | 77.68                | 0.87                    | 75.77                |

**Table S11. Confidence scores of modeled TCR–NRAS<sup>Q61K</sup>–HLA-A1 complexes**

<sup>1</sup>Number of models generated per complex for the protocol.

<sup>2</sup>Complex being modeled, denoted by TCR name. All TCRs modeled in complex with NRAS<sup>Q61K</sup>–HLA-A1 target. TCR N17.1.2 scores shown for comparison, while predictive modeling was performed for other NRAS<sup>Q61K</sup>–HLA-A1 TCRs described in Peri et al. (15).

<sup>3</sup>AlphaFold model confidence and interface pLDDT (I-pLDDT) scores are shown for the top-ranked model generated for the complex with the given protocol. For AlphaFold3, the provided “ranking\_score”, which has a slight modification of the AlphaFold2.3 model confidence score calculation, is shown for model confidence. Cells highlighted in green in cases with both score criteria were met (model confidence > 0.875, I-pLDDT > 87.5).
